# Supplementary material for: Activation of a Bacterial Mechanosensitive Channel, MscL, Underlies the Membrane Permeabilization of Dual-Targeting Antibacterial Compounds
Source: MDPI journal article supplement (doi:10.3390/antibiotics11070970), 2022-07-19
Supplement: s1 [file s1]

# Activating a Bacterial Mechanosensitive channel, MscL, Underlies the Membrane Permeabilization of Dual-Targeting Antibacterial Compounds

Robin Wray, Junmei Wang, Paul Blount and Irene Iscla

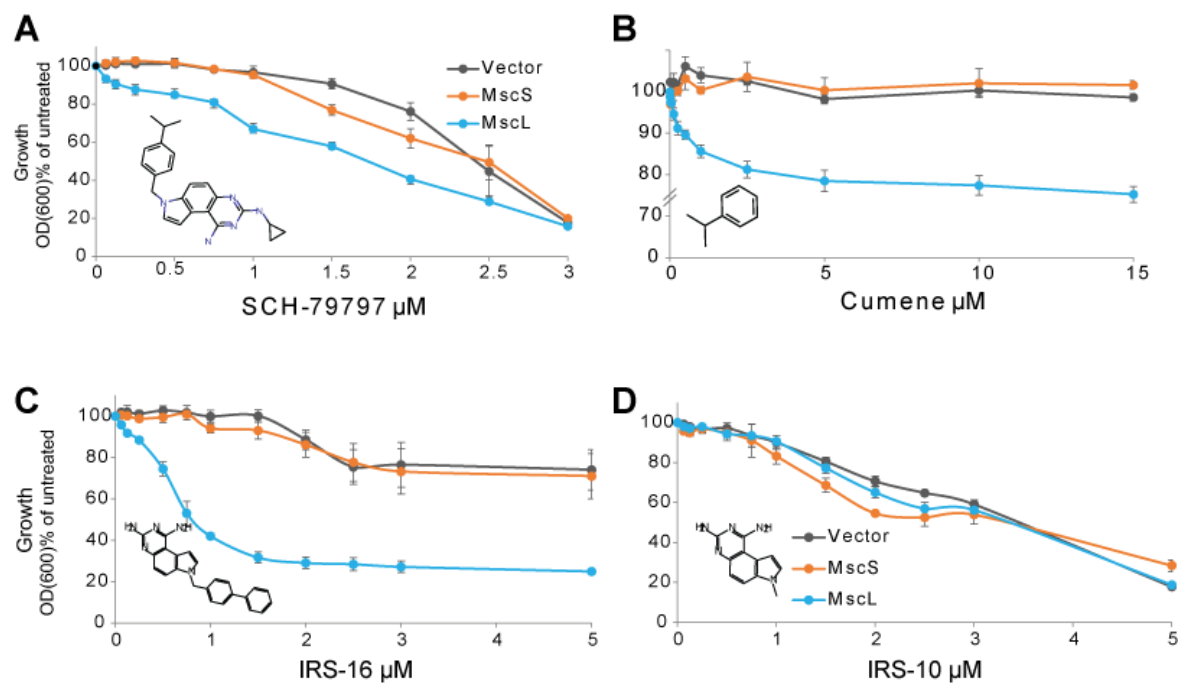

**Figure S1.** Growth of *E. coli* MJF 455 cells carrying either an empty vector or expression constructs of MscL or MscS channels. All data is represented as a percentage of the untreated sample. Cultures were treated with increasing concentrations of A. SCH-79797, B. cumene, C. IRS-16 and D. IRS-10. Structures of the compounds are depicted as inserts.

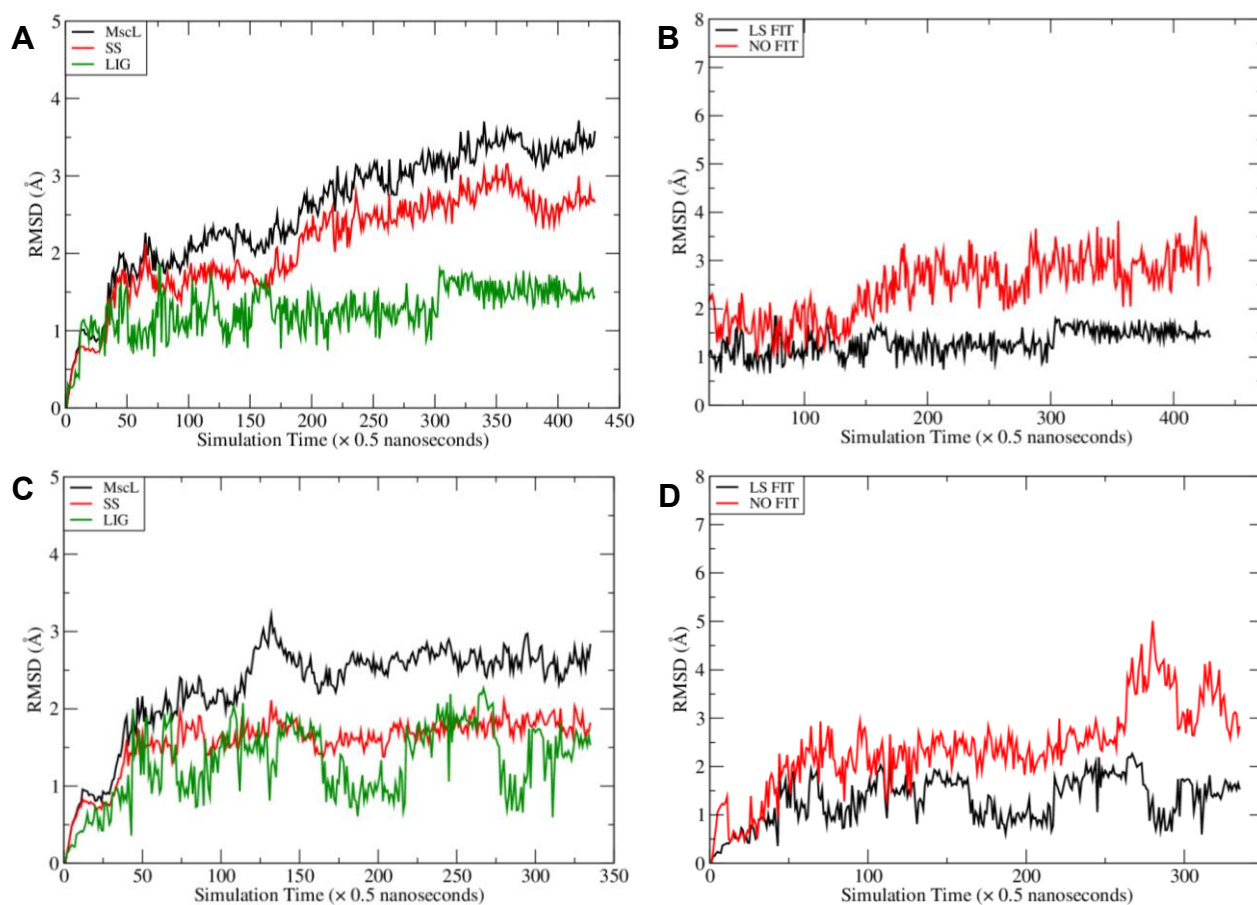

**Figure S2.** The time courses of Root-mean-square deviations (RMSD). A and B for SCH-79797, and C and D for IRS-16. B and D show the RMSDs of ligands with and without least-square fitting.

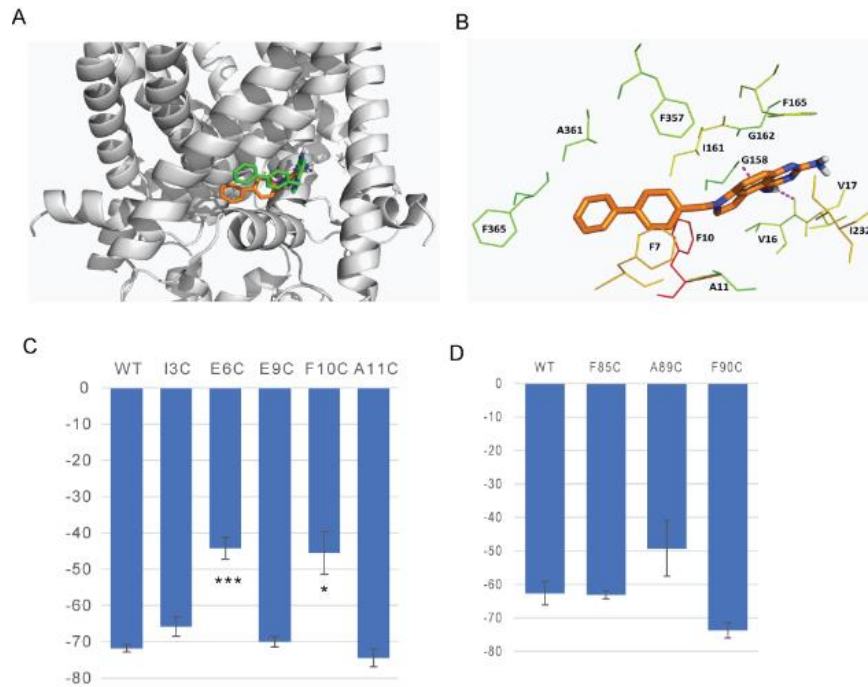

**Figure S3.** Data indicating a binding pocket for IRS16 to MscL. (A) Docking (greenish sticks) and representative MD (brownish sticks) binding poses for IRS16 and in vivo experiments supporting the binding site. (B) The key residues ( $\Delta G_{MM}^{lig-res} < -0.5$  kcal/mol). The more reddish a residue is, the stronger the ligand-residue interactions, the more greenish a residue is, the weaker the ligand-residue interactions. (C) Growth inhibition of MJF455 cultures expressing Eco MscL WT and N-terminal mutants, after treatment with 1  $\mu$ M IRS-16, expressed as a percentage of the untreated cultures. (D) C-terminal mutants. T test non paired  $n \geq 3$  \* $p \leq 0.05$ , \*\*\*  $p \leq 0.0005$ .

Table S1. MM-PBSA-WSAS Binding Free Energy of the Identified Inhibitors of E. coli MscL Channel. All Energy Terms Are in kcal/mol.

| Compound  | $\Delta E_{VDW}$  | $\Delta E_{eel}$  | $\Delta G_{sol}^{polar}$ | $\Delta G_{sol}^{nonpolar}$ | T $\Delta S$      | $\Delta G_{MMPBSA}$ |
|-----------|-------------------|-------------------|--------------------------|-----------------------------|-------------------|---------------------|
| SCH-79797 | -43.05 $\pm$ 1.15 | -1.15 $\pm$ 0.16  | 9.16 $\pm$ 0.02          | -4.34 $\pm$ 0.00            | -21.78 $\pm$ 0.08 | -23.57 $\pm$ 0.11   |
| IRS-16    | -39.59 $\pm$ 1.49 | -6.9 3 $\pm$ 0.46 | 12.55 $\pm$ 0.07         | -3.76 $\pm$ 0.01            | -20.61 $\pm$ 0.09 | -26.82 $\pm$ 0.55   |

Table S2. MM-GBSA Ligand-Residue Interaction Energies. Each residue is assigned a docking score value with more negative values indicating a stronger role in binding SCH-79797. All Energy Terms Are in kcal/mol. All interaction energies better than -2.0 kcal/mol were colored in red and those between -2.0 and -1.0 kcal/mol were colored in blue.

| Res Type | Res ID | Res ID* | $\Delta G_{\text{Ligand-Residue}}$ (kcal/mol) |              |
|----------|--------|---------|-----------------------------------------------|--------------|
|          |        |         | SCH-79797                                     | IRS-16       |
| ILE      | 3      | 3       | -0.91                                         | -0.27        |
| GLU      | 6      | 6       | <b>-1.22</b>                                  | -0.47        |
| PHE      | 7      | 7       | <b>-2.48</b>                                  | <b>-1.90</b> |
| GLU      | 9      | 9       | -0.16                                         | -0.21        |
| PHE      | 10     | 10      | <b>-1.95</b>                                  | <b>-3.10</b> |
| ALA      | 11     | 11      | -                                             | -0.68        |
| ARG      | 13     | 13      | -                                             | -0.29        |
| GLY      | 14     | 14      | -                                             | -0.21        |
| VAL      | 16     | 16      | -                                             | <b>-1.03</b> |
| VAL      | 17     | 17      | <b>-0.10</b>                                  | <b>-1.37</b> |
| ALA      | 20     | 20      | -                                             | -0.39        |
| VAL      | 21     | 21      | -                                             | -0.12        |
| ILE      | 24     | 24      | -                                             | -0.11        |
| ASP      | 154    | 18      | -0.93                                         | -            |
| VAL      | 157    | 21      | -0.45                                         | -            |
| GLY      | 158    | 22      | -0.28                                         | -0.54        |
| VAL      | 159    | 23      | -                                             | -0.18        |
| ILE      | 161    | 25      | <b>-2.19</b>                                  | <b>-1.55</b> |
| GLY      | 162    | 26      | -0.32                                         | -0.82        |
| PHE      | 165    | 29      | <b>-1.00</b>                                  | <b>-1.15</b> |
| ILE      | 228    | 92      | -0.31                                         | -0.34        |
| ALA      | 231    | 95      | -                                             | -0.13        |
| ILE      | 232    | 96      | -0.54                                         | <b>-1.85</b> |
| LYS      | 233    | 97      | -                                             | -0.20        |
| PHE      | 357    | 85      | <b>-1.18</b>                                  | -0.83        |
| LEU      | 358    | 86      | -0.23                                         | -0.40        |
| ALA      | 361    | 89      | <b>-1.01</b>                                  | -0.82        |
| PHE      | 362    | 90      | -0.23                                         | -0.42        |
| ILE      | 364    | 92      | -0.76                                         | -0.20        |
| PHE      | 365    | 93      | <b>-1.38</b>                                  | -0.57        |
| ILE      | 368    | 96      | -0.60                                         | -            |
| LYS      | 369    | 97      | <b>-1.49</b>                                  | -            |

\*The corresponding residue ID in single chain of the E. coli MscL.
